# Supplementary material for: High TNFSF13B expression as a predictor of poor prognosis in adrenocortical carcinoma
Source: PubMed Central journal article supplement — Transl Androl Urol. 2021 Aug;10(8):3275–85. doi: 10.21037/tau-21-232 (PMC8421843; doi:10.21037/tau-21-232), 2021-08
Supplement: tau-10-08-3275-supplementary.pdf [file tau-10-08-3275-supplementary.pdf]

Table S1 The expression levels of TNFSF13B in 79 ACC tumor tissues and 190 normal adrenal gland tissues

| Group                    | Sample ID                 | TNFSF13B expression level |
|--------------------------|---------------------------|---------------------------|
| Cancer                   | TCGA.OR.A5J1.01A          | 35.55493254               |
|                          | TCGA.OR.A5J2.01A          | 50.44403995               |
|                          | TCGA.OR.A5J3.01A          | 2.49375608                |
|                          | TCGA.OR.A5J5.01A          | 3.383237206               |
|                          | TCGA.OR.A5J6.01A          | 0.948643688               |
|                          | TCGA.OR.A5J7.01A          | 31.05294024               |
|                          | TCGA.OR.A5J8.01A          | 17.29063942               |
|                          | TCGA.OR.A5J9.01A          | 216.1420843               |
|                          | TCGA.OR.A5JA.01A          | 7.832313437               |
|                          | TCGA.OR.A5JB.01A          | 12.84022696               |
|                          | TCGA.OR.A5JC.01A          | 11.28618831               |
|                          | TCGA.OR.A5JD.01A          | 3.784010001               |
|                          | TCGA.OR.A5JE.01A          | 62.55556935               |
|                          | TCGA.OR.A5JF.01A          | 25.59486687               |
|                          | TCGA.OR.A5JG.01A          | 3.800749518               |
|                          | TCGA.OR.A5JI.01A          | 6.923947559               |
|                          | TCGA.OR.A5JJ.01A          | 5.483135171               |
|                          | TCGA.OR.A5JK.01A          | 12.13840993               |
|                          | TCGA.OR.A5JL.01A          | 30.77440142               |
|                          | TCGA.OR.A5JM.01A          | 357.5898053               |
|                          | TCGA.OR.A5JO.01A          | 6.071012897               |
|                          | TCGA.OR.A5JP.01A          | 91.30896983               |
|                          | TCGA.OR.A5JQ.01A          | 5.209878186               |
|                          | TCGA.OR.A5JR.01A          | 4.000580032               |
|                          | TCGA.OR.A5JS.01A          | 45.24296755               |
|                          | TCGA.OR.A5JT.01A          | 1.595162062               |
|                          | TCGA.OR.A5JV.01A          | 16.87514915               |
|                          | TCGA.OR.A5JW.01A          | 6.994206264               |
|                          | TCGA.OR.A5JX.01A          | 1.737686764               |
|                          | TCGA.OR.A5JY.01A          | 83.50195935               |
|                          | TCGA.OR.A5JZ.01A          | 4.996911099               |
|                          | TCGA.OR.A5K0.01A          | 69.41281441               |
|                          | TCGA.OR.A5K1.01A          | 4.426339552               |
|                          | TCGA.OR.A5K2.01A          | 61.25043368               |
|                          | TCGA.OR.A5K3.01A          | 6.266915821               |
|                          | TCGA.OR.A5K4.01A          | 1.194871844               |
|                          | TCGA.OR.A5K5.01A          | 86.2411978                |
|                          | TCGA.OR.A5K6.01A          | 40.6157137                |
|                          | TCGA.OR.A5K8.01A          | 6.704437561               |
|                          | TCGA.OR.A5K9.01A          | 194.1403784               |
|                          | TCGA.OR.A5K0.01A          | 9.209284157               |
|                          | TCGA.OR.A5KT.01A          | 12.87612189               |
|                          | TCGA.OR.A5KU.01A          | 2.256451398               |
|                          | TCGA.OR.A5KV.01A          | 79.35773497               |
|                          | TCGA.OR.A5KW.01A          | 14.29878792               |
|                          | TCGA.OR.A5KX.01A          | 46.89277423               |
|                          | TCGA.OR.A5KY.01A          | 4.162913571               |
|                          | TCGA.OR.A5KZ.01A          | 4.458480666               |
|                          | TCGA.OR.A5L3.01A          | 34.69181656               |
|                          | TCGA.OR.A5L4.01A          | 3.37794547                |
|                          | TCGA.OR.A5L5.01A          | 7.795232773               |
|                          | TCGA.OR.A5L6.01A          | 3.717030387               |
|                          | TCGA.OR.A5L8.01A          | 1.12435183                |
|                          | TCGA.OR.A5L9.01A          | 10.79008386               |
|                          | TCGA.OR.A5LA.01A          | 6.985448427               |
|                          | TCGA.OR.A5LB.01A          | 13.81257064               |
|                          | TCGA.OR.A5LC.01A          | 60.78092724               |
|                          | TCGA.OR.A5LD.01A          | 1.325304591               |
|                          | TCGA.OR.A5LE.01A          | 165.0493037               |
|                          | TCGA.OR.A5LG.01A          | 32.73825371               |
|                          | TCGA.OR.A5LH.01A          | 17.08635199               |
| TCGA.OR.A5LJ.01A         | 9.956327257               |                           |
| TCGA.OR.A5LK.01A         | 10.21833889               |                           |
| TCGA.OR.A5LL.01A         | 23.79068055               |                           |
| TCGA.OR.A5LM.01A         | 12.11528084               |                           |
| TCGA.OR.A5LN.01A         | 7.148712209               |                           |
| TCGA.OR.A5LO.01A         | 18.63191653               |                           |
| TCGA.OR.A5LP.01A         | 6.65272125                |                           |
| TCGA.OR.A5LR.01A         | 1.603704285               |                           |
| TCGA.OR.A5LS.01A         | 3.317090377               |                           |
| TCGA.OR.A5LT.01A         | 1.862045174               |                           |
| TCGA.OJ.A5PI.01A         | 12.73407082               |                           |
| TCGA.P6.A5OF.01A         | 69.87470928               |                           |
| TCGA.P6.A5OG.01A         | 10.41986953               |                           |
| TCGA.PA.A5YG.01A         | 6.224948028               |                           |
| TCGA.PK.A5H8.01A         | 8.706739667               |                           |
| TCGA.PK.A5H9.01A         | 1.880810031               |                           |
| TCGA.PK.A5HA.01A         | 3.090439024               |                           |
| TCGA.PK.A5HB.01A         | 1.897874641               |                           |
| Normal                   | GTEX-111CU-0126-SM-5GZWS  | 7.136207233               |
|                          | GTEX-111YS-0126-SM-5987T  | 13.98705725               |
|                          | GTEX-1122O-0326-SM-5H124  | 3.500176166               |
|                          | GTEX-117YX-0126-SM-5EGH5  | 23.10245262               |
|                          | GTEX-11DXX-0126-SM-5EGH7  | 3.816206105               |
|                          | GTEX-11DXY-1626-SM-5H12L  | 9.555646519               |
|                          | GTEX-11DXZ-0226-SM-5EGGZ  | 5.927179646               |
|                          | GTEX-11EM3-0326-SM-5A5KJ  | 27.3993174                |
|                          | GTEX-11EMC-0526-SM-5EGJN  | 7.381548869               |
|                          | GTEX-11EQ9-0126-SM-5986I  | 8.917507152               |
|                          | GTEX-11GSP-0326-SM-5A5KW  | 6.753750561               |
|                          | GTEX-11178-1826-SM-5A5M4  | 3.273735039               |
|                          | GTEX-11NSD-0226-SM-5A5LR  | 11.28739947               |
|                          | GTEX-11P7K-0126-SM-5986E  | 10.44931171               |
|                          | GTEX-11TT1-0126-SM-5LUAA  | 23.2582923                |
|                          | GTEX-11XUK-0126-SM-5CVLK  | 3.993130943               |
|                          | GTEX-1211K-0126-SM-59HJE  | 7.831715074               |
|                          | GTEX-12696-0626-SM-5EGGD  | 2.898698487               |
|                          | GTEX-12BJ1-0526-SM-5FQUO  | 12.69775796               |
|                          | GTEX-12WSD-2126-SM-5LZWK  | 5.152994947               |
|                          | GTEX-12WSG-0726-SM-5EGIG  | 7.561022389               |
|                          | GTEX-12WSJ-0126-SM-5GCOM  | 10.60860315               |
|                          | GTEX-12WSK-0326-SM-5GCOJ  | 12.87340311               |
|                          | GTEX-12WSL-0326-SM-5CVMK  | 14.80390007               |
|                          | GTEX-12WSN-0926-SM-5GCN1  | 14.50774904               |
|                          | GTEX-12ZZZ-0926-SM-5N9EQ  | 7.793649798               |
|                          | GTEX-13111-0326-SM-5DUXF  | 5.967442508               |
|                          | GTEX-131XF-0126-SM-5DUVF  | 7.832188729               |
|                          | GTEX-131XG-1326-SM-5DUX4  | 5.454815694               |
|                          | GTEX-131YS-2026-SM-5P9J8  | 7.316166283               |
|                          | GTEX-132AR-1726-SM-5EGHQ  | 5.098840138               |
|                          | GTEX-132NY-2226-SM-5J2LZ  | 28.46069145               |
|                          | GTEX-132QS-0126-SM-5IFH9  | 3.587272946               |
|                          | GTEX-1339X-0826-SM-5J2O6  | 18.78967874               |
|                          | GTEX-1399R-0326-SM-5KM1X  | 31.7369854                |
|                          | GTEX-1399S-0426-SM-5IFG5  | 4.854656726               |
|                          | GTEX-1399U-0226-SM-5P9J2  | 2.906686505               |
|                          | GTEX-139YR-0126-SM-5IJEY  | 22.04946602               |
|                          | GTEX-13CF3-0126-SM-5IFFM  | 6.577769765               |
|                          | GTEX-13D11-0426-SM-5LZYA  | 4.852179169               |
|                          | GTEX-13FH7-0226-SM-5IFGG  | 4.062912862               |
|                          | GTEX-13FTW-0126-SM-5IUED  | 4.856508235               |
|                          | GTEX-13N11-0826-SM-5IJFP  | 5.636740873               |
|                          | GTEX-13O21-0126-SM-5IJE8  | 8.76519904                |
|                          | GTEX-13O3O-1626-SM-5KM1O  | 10.01699203               |
|                          | GTEX-13O61-0126-SM-5KM4P  | 12.64613094               |
|                          | GTEX-13OVI-1226-SM-5J2ME  | 3.792624276               |
|                          | GTEX-13OW6-1726-SM-5IJGI  | 5.91900424                |
|                          | GTEX-13OW7-2726-SM-5L3HN  | 7.236350891               |
|                          | GTEX-13PL7-1026-SM-5MP5C  | 5.227765188               |
|                          | GTEX-13PVR-0226-SM-5RQJI  | 7.277065505               |
|                          | GTEX-13QBU-0526-SM-5IJFE  | 4.505311163               |
|                          | GTEX-13W3W-1326-SM-5LUJ4T | 8.765619694               |
|                          | GTEX-144GL-1826-SM-79OMB  | 13.93482294               |
|                          | GTEX-145LT-0126-SM-5S2QJ  | 7.658993422               |
|                          | GTEX-145MN-0226-SM-5QGPY  | 6.244471494               |
|                          | GTEX-146FR-1526-SM-5SIB8  | 7.991333891               |
|                          | GTEX-14753-1726-SM-5N09X  | 5.103283743               |
|                          | GTEX-147F4-2526-SM-5NQBB  | 4.207814948               |
|                          | GTEX-14A51-2126-SM-5NQA8  | 7.098095592               |
|                          | GTEX-14BMU-0126-SM-5S2Q9  | 17.64036115               |
|                          | GTEX-14C38-1726-SM-5RQJ3  | 6.975791244               |
|                          | GTEX-14C39-0226-SM-664OG  | 3.243797866               |
|                          | GTEX-14DAQ-1826-SM-5S2VW  | 5.142848018               |
|                          | GTEX-14DAR-1726-SM-664MZ  | 6.437190211               |
|                          | GTEX-14E1K-0626-SM-5S2PG  | 4.437680727               |
|                          | GTEX-14E6E-0126-SM-7KXKH  | 5.751296316               |
|                          | GTEX-14H4A-0226-SM-5S16Q  | 6.060912821               |
|                          | GTEX-14JG6-0126-SM-6872F  | 5.682021197               |
|                          | GTEX-14PJ4-0426-SM-6871F  | 9.491477496               |
|                          | GTEX-14PJ6-0126-SM-686Z5  | 12.68716537               |
|                          | GTEX-14PK6-0126-SM-664O1  | 16.63675599               |
|                          | GTEX-14PKV-0726-SM-686Z8  | 5.370617005               |
|                          | GTEX-14PN3-1426-SM-686Z8  | 18.61439033               |
|                          | GTEX-14XAO-0326-SM-6ETZ9  | 8.953626814               |
|                          | GTEX-15CHR-0626-SM-731FS  | 11.55137371               |
|                          | GTEX-15DYW-2126-SM-6M47B  | 6.358482831               |
|                          | GTEX-15ER7-1126-SM-6M47F  | 20.19352384               |
|                          | GTEX-15EU6-0326-SM-6M48F  | 6.95501828                |
|                          | GTEX-15SHU-1926-SM-7KUMO  | 6.435737087               |
|                          | GTEX-16AAH-0226-SM-793A8  | 17.20732434               |
|                          | GTEX-16MT8-1626-SM-7EWDV  | 6.795196008               |
|                          | GTEX-16NGA-0126-SM-72D6U  | 7.599920129               |
|                          | GTEX-17HGU-0126-SM-7DHVU  | 7.195795154               |
|                          | GTEX-17HHE-0226-SM-79399  | 13.38114607               |
|                          | GTEX-17HHY-2226-SM-7KFS4  | 19.51564417               |
|                          | GTEX-17K51-0326-SM-7KFS5  | 7.37552333                |
|                          | GTEX-18A6Q-1826-SM-72DS6  | 7.149256305               |
|                          | GTEX-18A7A-1826-SM-7KFTU  | 7.098591129               |
|                          | GTEX-18D9B-1926-SM-7KFSV  | 16.17766823               |
|                          | GTEX-1A3MW-0226-SM-731FS  | 6.997006313               |
|                          | GTEX-1A3MW-2126-SM-731DO  | 11.71206174               |
|                          | GTEX-1AMFI-0626-SM-731DR  | 6.634789882               |
|                          | GTEX-1AX8Z-2426-SM-72D7D  | 13.52344054               |
|                          | GTEX-1AX9J-0626-SM-72D7L  | 16.49124332               |
|                          | GTEX-1B8KE-0926-SM-71891  | 16.28810178               |
|                          | GTEX-1B8KZ-0126-SM-7DHM5  | 8.865203916               |
|                          | GTEX-1B8L1-1326-SM-7MKG6  | 5.809574771               |
|                          | GTEX-1BAJH-2626-SM-7EPG6  | 7.362078725               |
|                          | GTEX-1C475-0126-SM-731DC  | 7.71513248                |
|                          | GTEX-1CAMR-0126-SM-79391  | 7.016725351               |
|                          | GTEX-1CAMS-0226-SM-79397  | 5.915410997               |
|                          | GTEX-1EKGK-2126-SM-7MKFT  | 9.666444304               |
|                          | GTEX-1F5PL-2326-SM-7MKFC  | 14.50246939               |
|                          | GTEX-1NFK9-1726-SM-3JTW8P | 4.119701256               |
|                          | GTEX-O5Y7-1326-SM-3MJGR   | 49.89597857               |
|                          | GTEX-O5YV-1126-SM-3LK73   | 9.695014773               |
|                          | GTEX-OHPK-1326-SM-3MJGN   | 5.026055924               |
|                          | GTEX-OHPL-1326-SM-3MJGH   | 12.85204698               |
|                          | GTEX-OIZH-1326-SM-3NB11G  | 17.14643177               |
|                          | GTEX-OQBK-3125-SM-3LK5R   | 10.76040306               |
|                          | GTEX-OXRK-0126-SM-3NB1E   | 14.7827588                |
|                          | GTEX-P4QS-1326-SM-3NMD3   | 7.146780863               |
|                          | GTEX-P4QT-1326-SM-3NMD3   | 18.12304993               |
|                          | GTEX-PLZ5-0326-SM-3P614   | 9.915620548               |
|                          | GTEX-PLZ6-0226-SM-3P611   | 4.977860202               |
|                          | GTEX-PW2O-0226-SM-48TC7   | 21.82090036               |
|                          | GTEX-PWCY-0226-SM-48TD8   | 4.949079896               |
|                          | GTEX-PXY3-1326-SM-48TU8   | 11.24100605               |
|                          | GTEX-Q2AH-0126-SM-48U2B   | 9.285168898               |
|                          | GTEX-Q2AI-0226-SM-48U1D   | 7.950354582               |
|                          | GTEX-QCQG-0126-SM-48U1E   | 26.83504616               |
|                          | GTEX-QCQG-0126-SM-48U27   | 10.87981443               |
|                          | GTEX-QDVJ-1126-SM-48U1U   | 10.03900485               |
|                          | GTEX-QDVN-0426-SM-48TZ6   | 12.7395428                |
|                          | GTEX-QEG5-1826-SM-4R1JP   | 15.25136394               |
|                          | GTEX-QLQ7-0126-SM-4R1JW   | 7.226845823               |
|                          | GTEX-QLQW-0226-SM-447BJ   | 4.349725475               |
|                          | GTEX-QMRM-0126-SM-4R1K9   | 17.24375202               |
|                          | GTEX-R53T-0226-SM-48FEH   | 6.497728691               |
|                          | GTEX-R55C-0226-SM-48FEO   | 6.812734347               |
|                          | GTEX-R55G-0126-SM-48FDS   | 7.707805758               |
|                          | GTEX-REY6-1726-SM-48FDL   | 9.77919488                |
|                          | GTEX-RM2N-0126-SM-48FDD   | 9.457509243               |
|                          | GTEX-RUSQ-0226-SM-47JWT   | 3.5046623                 |
|                          | GTEX-S32W-1326-SM-4AD61   | 8.120357829               |
| GTEX-S33H-1326-SM-4AD6A  | 10.03798417               |                           |
| GTEX-S341-0126-SM-4AD64  | 7.450670499               |                           |
| GTEX-S3XE-0126-SM-4AD4R  | 7.154484685               |                           |
| GTEX-S4Q7-0226-SM-4AD5O  | 19.47812207               |                           |
| GTEX-S4Z8-0126-SM-4DICC  | 8.169641869               |                           |
| GTEX-T6MO-0126-SM-4DM6X  | 9.215719982               |                           |
| GTEX-TKQ2-0226-SM-4DM6V  | 9.47126268                |                           |
| GTEX-TMMY-0126-SM-4DXTP  | 4.971979087               |                           |
| GTEX-U3ZM-0226-SM-4DXS7  | 5.270229732               |                           |
| GTEX-U3ZN-0826-SM-4DXSZ  | 16.19983829               |                           |
| GTEX-U4B1-0126-SM-4DXSN  | 12.44530636               |                           |
| GTEX-UJMC-0226-SM-4IHHLH | 2.638398603               |                           |
| GTEX-V1D1-0226-SM-4JBHG  | 7.373999971               |                           |
| GTEX-V955-0126-SM-4JBH5  | 14.39224048               |                           |
| GTEX-VJYA-0526-SM-4KL1R  | 4.710993087               |                           |
| GTEX-VUSG-1526-SM-4KKZH  | 11.60007679               |                           |
| GTEX-W5WG-1126-SM-4LLMK4 | 11.22656689               |                           |
| GTEX-WFGB-0126-SM-4LVMK4 | 22.48118354               |                           |
| GTEX-WHPG-1526-SM-4M12K  | 24.2039432                |                           |
| GTEX-WQUQ-0126-SM-4OOSS  | 16.43022178               |                           |
| GTEX-WY7C-0326-SM-4OND5  | 5.848479615               |                           |
| GTEX-WYVS-0226-SM-4OAS7  | 9.914502899               |                           |
| GTEX-X4LF-0126-SM-4QAS7  | 10.45916311               |                           |
| GTEX-XMK1-0226-SM-4B65D  | 7.893091473               |                           |
| GTEX-XQ3S-1726-SM-4BOOD  | 13.18436255               |                           |
| GTEX-XUZC-0226-SM-4BROV  | 6.116539054               |                           |
| GTEX-XV7Q-0226-SM-4BRV7  | 10.46445489               |                           |
| GTEX-XYKS-0926-SM-4BRVG  | 16.71498566               |                           |
| GTEX-Y114-0526-SM-4TT8V  | 3.597548235               |                           |
| GTEX-Y3IK-0226-SM-51MRJ  | 17.14030862               |                           |
| GTEX-Y5LM-0126-SM-4VBRJ  | 11.37076918               |                           |
| GTEX-Y5V5-1326-SM-4V6G9  | 5.055219041               |                           |
| GTEX-Y5V6-1926-SM-5IFIL  | 10.44559212               |                           |
| GTEX-Y9LG-0126-SM-5O59W  | 15.31906559               |                           |
| GTEX-YB5E-0226-SM-5IFIH  | 3.697961056               |                           |
| GTEX-YF7O-0126-SM-5IFIR  | 3.31477613                |                           |
| GTEX-YFCO-0126-SM-4W1YT  | 10.87499582               |                           |
| GTEX-ZA64-0226-SM-5HL9C  | 3.421538231               |                           |
| GTEX-ZDTT-0126-SM-4WKHA  | 3.131169427               |                           |
| GTEX-ZF2S-0126-SM-4WKFO  | 11.34826972               |                           |
| GTEX-ZLFU-0826-SM-4WWBP  | 7.077501019               |                           |
| GTEX-ZLV1-0226-SM-4WWC1  | 9.735716417               |                           |
| GTEX-ZLWG-0126-SM-4WWC5  | 3.967303771               |                           |
| GTEX-ZP4G-0126-SM-4YCE3  | 8.713503397               |                           |
| GTEX-ZT9W-0126-SM-4YCFD  | 4.958244359               |                           |
| GTEX-ZT9X-0126-SM-4YCFC  | 19.28773295               |                           |
| GTEX-ZTSS-0326-SM-5987M  | 3.706647509               |                           |
| GTEX-ZUA1-1926-SM-5E45E  | 3.824574428               |                           |
| GTEX-ZVAP-0126-SM-5NQ7D  | 4.214387916               |                           |
| GTEX-ZVT2-0826-SM-5GIEO  | 7.654817797               |                           |
| GTEX-ZY6K-0126-SM-5SIAM  | 6.465563667               |                           |
| GTEX-ZYFG-0926-SM-5BC5U  | 8.80334943                |                           |
| GTEX-ZYVF-1626-SM-5N9EH  | 5.751760205               |                           |
| GTEX-ZZPU-1226-SM-5N9CK  | 5.196218151               |                           |

ACC, adrenocortical carcinoma; TNFSF13B, tumor necrosis factor ligand superfamily member 13B.

**Table S2** E3 ligases predicted by Ubibrowser

| Rank | E3       | Description                                                        | Confidence level | Score |
|------|----------|--------------------------------------------------------------------|------------------|-------|
| 1    | SYVN1    | E3 ubiquitin-protein ligase synoviolin                             | MIDDLE           | 0.714 |
| 2    | CBL      | E3 ubiquitin-protein ligase CBL                                    | MIDDLE           | 0.676 |
| 3    | TRAF6    | TNF receptor-associated factor 6                                   | MIDDLE           | 0.671 |
| 4    | MIB1     | E3 ubiquitin-protein ligase MIB1                                   | MIDDLE           | 0.668 |
| 5    | MALT1    | Mucosa-associated lymphoid tissue lymphoma translocation protein 1 | LOW              | 0.657 |
| 6    | TRAF3IP2 | Adapter protein CIKS                                               | LOW              | 0.653 |
| 7    | TRAF2    | TNF receptor-associated factor 2                                   | LOW              | 0.653 |
| 8    | TRAF5    | TNF receptor-associated factor 5                                   | LOW              | 0.649 |
| 9    | SMURF1   | E3 ubiquitin-protein ligase SMURF1                                 | LOW              | 0.647 |
| 10   | STUB1    | E3 ubiquitin-protein ligase CHIP                                   | LOW              | 0.64  |
| 11   | NEDD4    | E3 ubiquitin-protein ligase NEDD4                                  | LOW              | 0.64  |
| 12   | PAFAH1B1 | Platelet-activating factor acetylhydrolase IB subunit alpha        | LOW              | 0.64  |
| 13   | MARCH1   | E3 ubiquitin-protein ligase MARCH1                                 | LOW              | 0.633 |
| 14   | MARCH8   | E3 ubiquitin-protein ligase MARCH8                                 | LOW              | 0.633 |
| 15   | BIRC2    | Baculoviral IAP repeat-containing protein 2                        | LOW              | 0.628 |
| 16   | NEDD4L   | E3 ubiquitin-protein ligase NEDD4-like                             | LOW              | 0.621 |
| 17   | MDM2     | E3 ubiquitin-protein ligase Mdm2                                   | LOW              | 0.619 |
| 18   | CADPS2   | Calcium-dependent secretion activator 2                            | LOW              | 0.615 |
| 19   | RPH3AL   | Rab effector Noc2                                                  | LOW              | 0.615 |
| 20   | SYTL4    | Synaptotagmin-like protein 4                                       | LOW              | 0.615 |
| 21   | WDTC1    | WD and tetratricopeptide repeats protein 1                         | LOW              | 0.615 |
| 22   | STC1     | Stanniocalcin-1                                                    | LOW              | 0.615 |
| 23   | IBTK     | Inhibitor of Bruton tyrosine kinase                                | LOW              | 0.615 |
| 24   | GNB1     | Guanine nucleotide-binding protein G(l)/G(S)/G(T) subunit beta-1   | LOW              | 0.615 |
| 25   | PHIP     | PH-interacting protein                                             | LOW              | 0.613 |
| 26   | DTX1     | E3 ubiquitin-protein ligase DTX1                                   | LOW              | 0.613 |
| 27   | PML      | Protein PML                                                        | LOW              | 0.613 |
| 28   | CBLC     | E3 ubiquitin-protein ligase CBL-C                                  | LOW              | 0.613 |
| 29   | PHRF1    | PHD and RING finger domain-containing protein 1                    | LOW              | 0.613 |
| 30   | SOCS7    | Suppressor of cytokine signaling 7                                 | LOW              | 0.613 |
| 31   | ERCC8    | DNA excision repair protein ERCC-8                                 | LOW              | 0.613 |
| 32   | TRIM33   | E3 ubiquitin-protein ligase TRIM33                                 | LOW              | 0.613 |
| 33   | ZEB2     | Zinc finger E-box-binding homeobox 2                               | LOW              | 0.613 |
| 34   | MARCH9   | E3 ubiquitin-protein ligase MARCH9                                 | LOW              | 0.604 |
| 35   | UBE3C    | Ubiquitin-protein ligase E3C                                       | LOW              | 0.604 |
| 36   | FZR1     | Fizzy-related protein homolog                                      | LOW              | 0.604 |
| 37   | GAN      | Gigaxonin                                                          | LOW              | 0.604 |
| 38   | MARCH11  | E3 ubiquitin-protein ligase MARCH11                                | LOW              | 0.604 |
| 39   | MARCH4   | E3 ubiquitin-protein ligase MARCH4                                 | LOW              | 0.604 |
| 40   | TTC3     | E3 ubiquitin-protein ligase TTC3                                   | LOW              | 0.604 |

The data was queried and downloaded from UbiBrowser (<http://ubibrowser.ncpsb.org/>).

**Table S3** Abbreviations of E3 type

| Abbreviations | Description                                                                            |
|---------------|----------------------------------------------------------------------------------------|
| BC-box        | A conserved elongin BC-binding site motif                                              |
| BTB           | Broad-complex, tramtrack and bric à brac                                               |
| CDC20         | Cell division cycle protein 20                                                         |
| DWD           | Damage specific DNA binding protein 1-binding WD40 protein                             |
| HECT          | Homologous to E6-associated protein C-terminus                                         |
| RING          | Really interesting new gene                                                            |
| SOCS          | Suppressors of cytokine signaling                                                      |
| UBOX          | A modified RING motif without the full complement of Zn <sup>2+</sup> -binding ligands |
| VHL           | Von Hippel-Lindau                                                                      |

**Table S4** Abbreviations of protein-protein interaction

| Abbreviations | Description                                           |
|---------------|-------------------------------------------------------|
| CD40LG        | Tumor necrosis factor ligand superfamily member 5     |
| TNF           | Tumor necrosis factor                                 |
| TNFRSF13B     | Tumor necrosis factor receptor superfamily member 13B |
| TNFRSF13C     | Tumor necrosis factor receptor superfamily member 13C |
| TNFRSF17      | Tumor necrosis factor receptor superfamily member 17  |
| TNFRSF1B      | Tumor necrosis factor receptor superfamily member 1B  |
| TNFSF11       | Tumor necrosis factor ligand superfamily member 11    |
| TNFSF12       | Tumor necrosis factor ligand superfamily member 12    |
| TNFSF13B      | Tumor necrosis factor ligand superfamily member 13B   |
| TRAF3         | Tumor necrosis factor receptor associated factor 3    |
| TRAF6         | Tumor necrosis factor receptor associated factor 6    |
